# Supplementary material for: Improved Solvothermal Synthesis of γ-Fe2O3 Magnetic Nanoparticles for SiO2 Coating
Source: MDPI journal article supplement (doi:10.3390/nano11081889), 2021-07-23
Supplement: s1 [file s1]

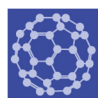

# Improved Solvothermal Synthesis of $\gamma$ -Fe<sub>2</sub>O<sub>3</sub> Magnetic Nanoparticles for SiO<sub>2</sub> Coating

Rashmi Mahajan \*, Subramanian Suriyanarayanan \* and Ian A. Nicholls

Linnaeus University Centre for Biomaterials Chemistry, Bioorganic and Biophysical Chemistry Laboratory,  
Department of Chemistry and Biomedical Sciences, Linnaeus University, SE-391 82 Kalmar, Sweden;  
ian.nicholls@lnu.se

\* Correspondence: rashmi.mahajan@lnu.se (R.M.); esusu@lnu.se (S.S.)

## Contents

|                                                                     |   |
|---------------------------------------------------------------------|---|
| 1. Magnetic Nanoparticles Prepared by Solvothermal Method .....     | 2 |
| 2. Effect of Different Concentration of MNPS in Silica Coating..... | 4 |
| 3. Effect of Various TEOS Concentration on Silica Coating.....      | 6 |
| 4. PDI of the Sc-MNPs .....                                         | 7 |
| 5. Magnetic Hysteresis Curves .....                                 | 8 |
| 6. Comparative Studies .....                                        | 9 |
| References.....                                                     | 9 |

# 1. Magnetic Nanoparticles Prepared by Solvothermal Method

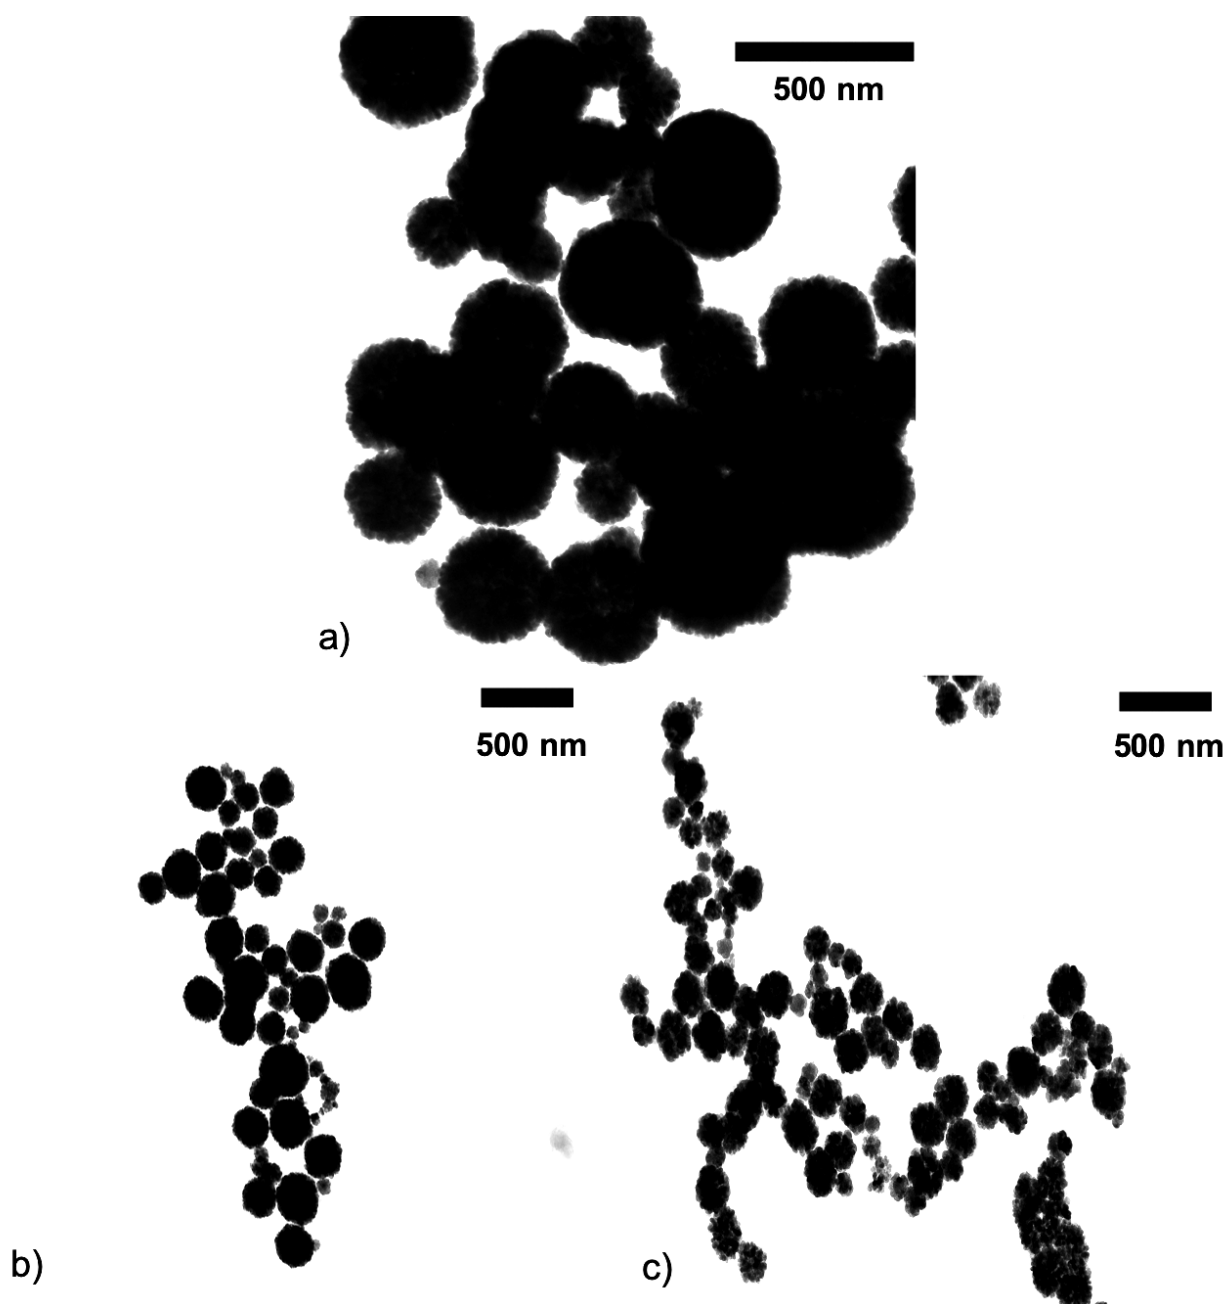

**Figure S1.** TEM micrographs (500 nm scale bar) of iron oxide magnetic nanoparticles prepared by solvothermal method using (a) no surfactant (b) SDS (sMNPS) (c) PEG (pMNPS).

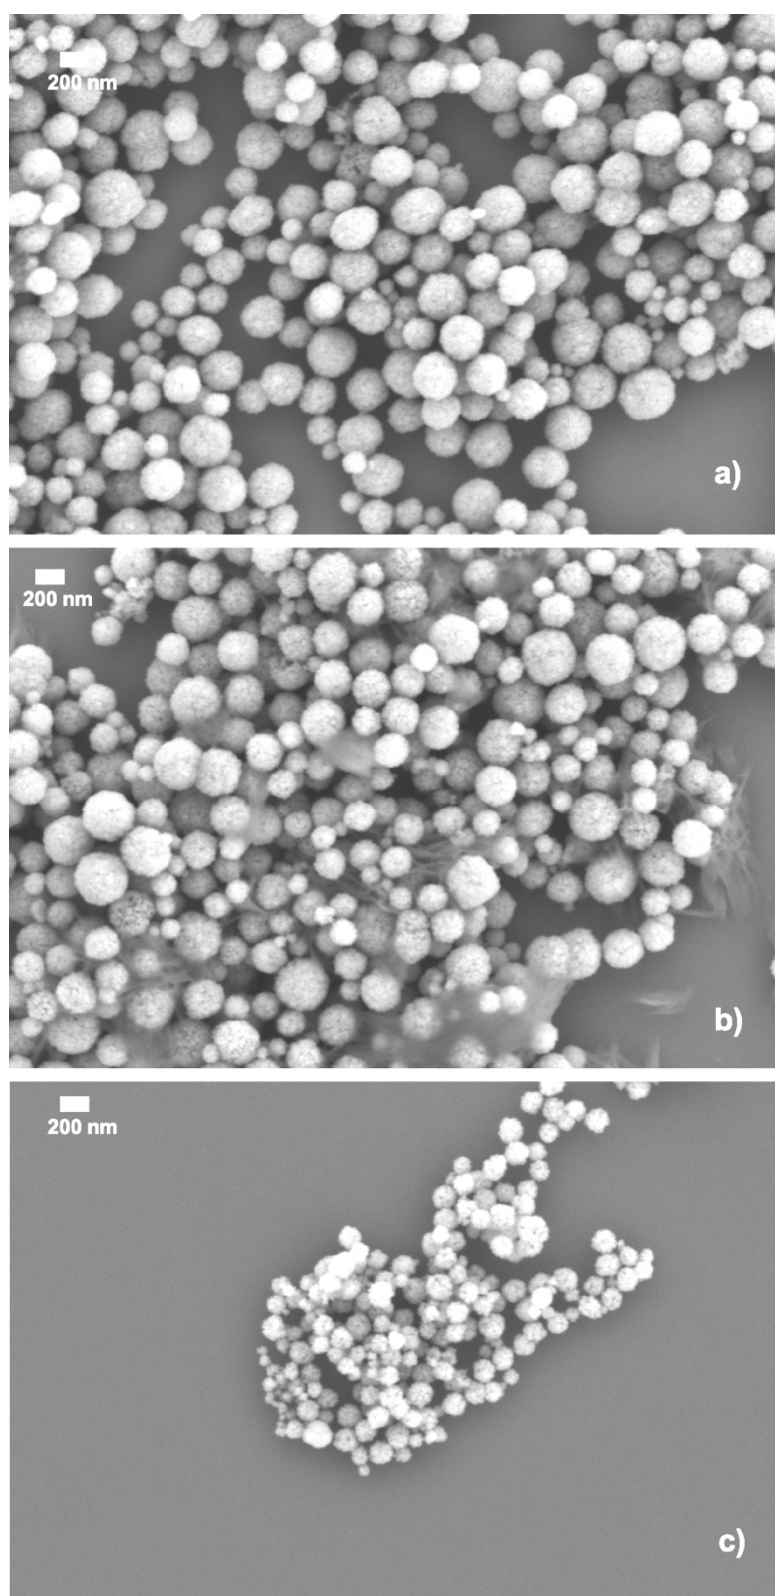

**Figure S2.** SEM micrographs (200 nm scale bar) of iron oxide magnetic nanoparticles prepared by solvothermal method using (a) no surfactant (b) SDS (sMNPS) (c) PEG (pMNPS).

## 2. Effect of Different Concentration of MNPS in Silica Coating

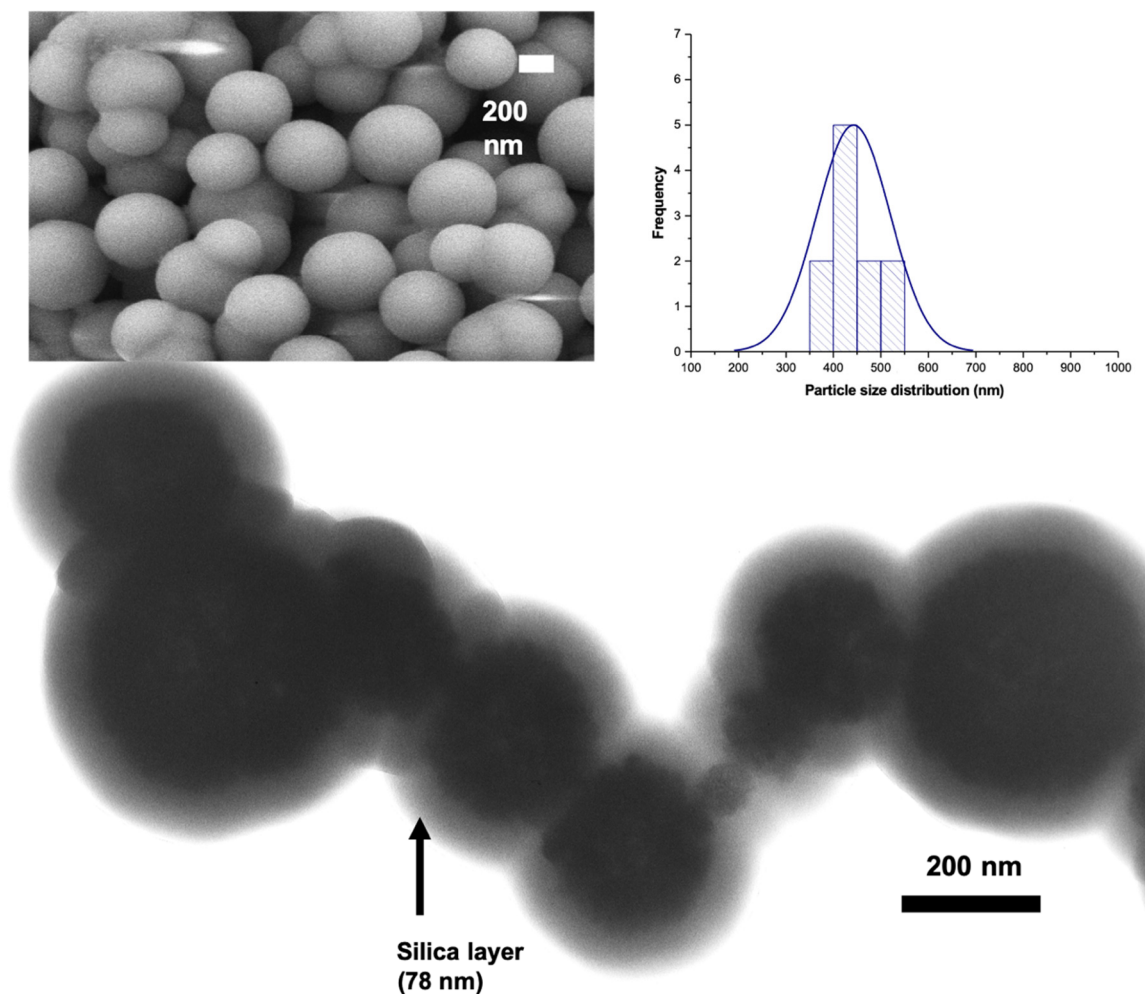

**Figure S3.** TEM & SEM (inset) images of sample O (0.5 mg/mL of MNPS), with particle size distribution, showing the silica layer of 78 nm encapsulating the magnetic core.

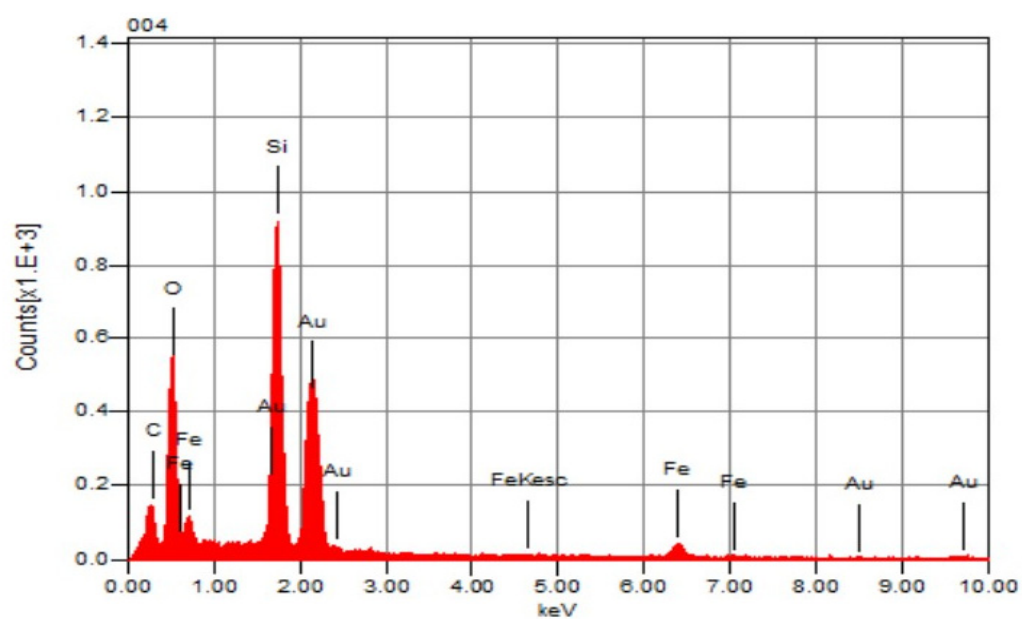

**Figure S4.** EDX graph confirming the presence of silica layer on the surface of magnetic nanoparticles (sample O).

### 3. Effect of Various TEOS Concentration on Silica Coating

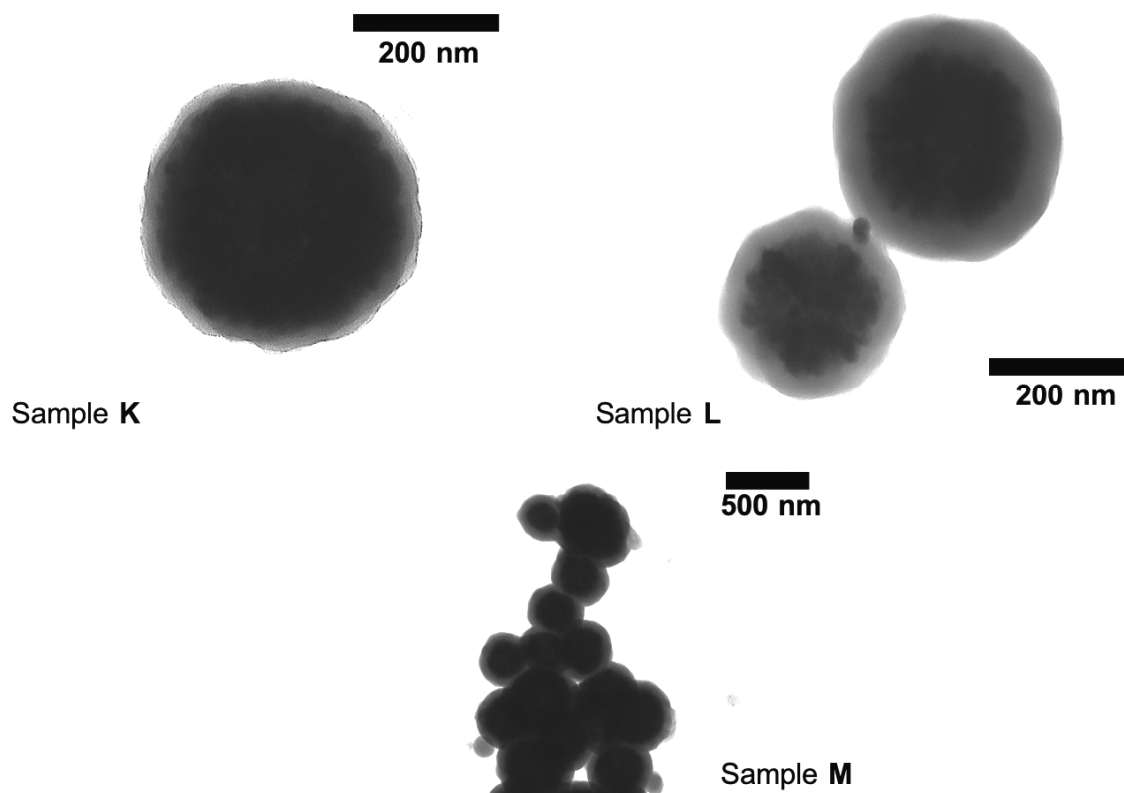

**Figure S5.** TEM micrographs of Sc-MNPS showing an increase in the thickness of the silica layer with respect to change in concentration of TEOS, sample K= 0.1 M, sample L= 0.25 M, sample M= 0.5 M.

## 4. PDI of the Sc-MNPs

**Table S1.** Data exhibiting polydispersity index (PDI) of the silica coated magnetic nanoparticles obtained by dynamic light scattering.

| Sample Name | PDI               | Silica Thickness    |
|-------------|-------------------|---------------------|
| A           | $0.104 \pm 0.033$ | No coating          |
| B           | $0.116 \pm 0.006$ | Non-uniform coating |
| C           | $0.087 \pm 0.027$ | Non-uniform coating |
| D           | $0.099 \pm 0.021$ | Non-uniform coating |
| E           | $0.095 \pm 0.014$ | Non-uniform coating |
| F           | $0.152 \pm 0.038$ | No coating          |
| G           | $0.190 \pm 0.048$ | Non-uniform coating |
| H           | $0.271 \pm 0.005$ | 30                  |
| I           | $0.111 \pm 0.068$ | 40                  |
| J           | $0.215 \pm 0.015$ | No coating          |
| K           | $0.230 \pm 0.052$ | 25                  |
| L           | $0.190 \pm 0.116$ | 40                  |
| M           | $0.164 \pm 0.113$ | 53                  |
| N           | $0.295 \pm 0.020$ | Non-uniform coating |
| O           | $0.185 \pm 0.034$ | 18                  |
| P           | $0.245 \pm 0.75$  | 122                 |

## 5. Magnetic Hysteresis Curves

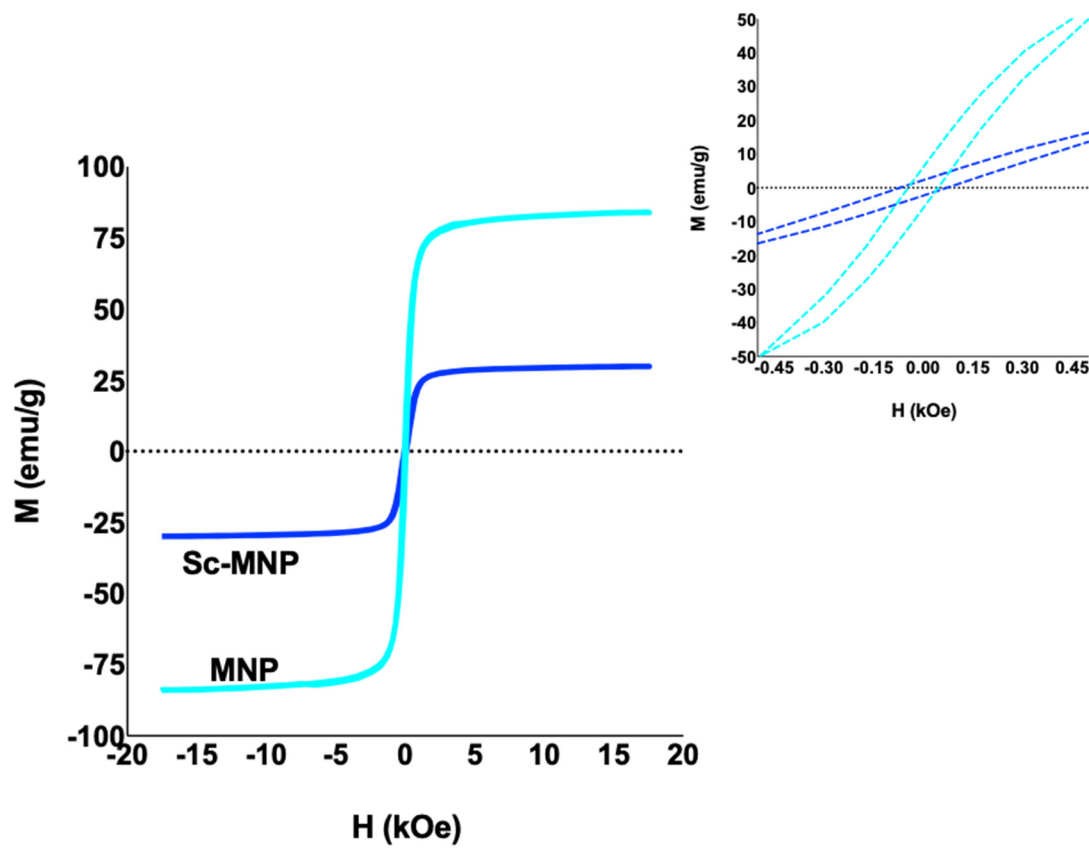

**Figure S6.** Magnetization hysteresis loops of MNPs (cyan) and Sc-MNP (sample P, blue) at 300 K with magnified loops inserted ( $H$ , magnetic field;  $M$ , magnetization).

## 6. Comparative Studies

**Table S2.** Comparison of material properties with those from previously reported studies.

| Methodology                 | Solvent                  | Temperature (°C) | Reaction Time (h) | Surfactants Used | Z-Average (nm) | PDI  | Crystal Structure                        |
|-----------------------------|--------------------------|------------------|-------------------|------------------|----------------|------|------------------------------------------|
| Solvothermal [1]            | Ethylene glycol (25 mL)  | 180              | 6                 | PEG/SDS          | 326            | -    | Fe <sub>3</sub> O <sub>4</sub>           |
|                             |                          |                  |                   | PEG              | 343            | -    |                                          |
|                             |                          |                  |                   | SDS              | 340            | -    |                                          |
|                             |                          |                  |                   | No surfactant    | 343            | -    |                                          |
| Solvothermal [2]            | Ethylene glycol (24 mL)  | 180              | 72                | PEG/SDS          | 80             | -    | Fe <sub>3</sub> O <sub>4</sub>           |
|                             |                          |                  |                   | PEG              | 200            | -    |                                          |
|                             |                          |                  |                   | SDS              | 150            | -    |                                          |
|                             |                          |                  |                   | No surfactant    | -              | -    |                                          |
| Solvothermal (current work) | Ethylene glycol (150 mL) | 200              | 24                | PEG/SDS          | 257            | 0.18 | $\gamma$ -Fe <sub>2</sub> O <sub>3</sub> |
|                             |                          |                  |                   | PEG              | 229            | 0.35 |                                          |
|                             |                          |                  |                   | SDS              | 293            | 0.17 |                                          |
|                             |                          |                  |                   | No surfactant    | 329            | 0.19 |                                          |
| Coprecipitation [3]         | Water                    | 60               | 1.5               | PEG              | 8.6            | 0.17 | Fe <sub>3</sub> O <sub>4</sub>           |

### References

1. Huang, Y.; Zhang, L.; Huan, W.; Liang, X.; Liu, X.; Yang, Y., A study on synthesis and properties of Fe<sub>3</sub>O<sub>4</sub> nanoparticles by solvothermal method. *Glass Phys. Chem.* **2010**, *36*, 325.
2. Yan, A.; Liu, X.; Qiu, G.; Wu, H.; Yi, R.; Zhang, N.; Xu, J., Solvothermal synthesis and characterization of size-controlled Fe<sub>3</sub>O<sub>4</sub> nanoparticles. *J. Alloys Compd.* **2008**, *458*, 487.
3. Antarnusa, G.; Suharyadi, E., A synthesis of polyethylene glycol (peg)-coated magnetite Fe<sub>3</sub>O<sub>4</sub> nanoparticles and their characteristics for enhancement of biosensor. *Mater. Res. Express.* **2020**, *7*, 056103.
